# Supplementary material for: Molecular structures of polymer/sulfur composites for lithium–sulfur batteries with long cycle life
Source: Royal Society of Chemistry journal article supplement (doi:10.1039/c3ta10865a), 2013-01-01
Supplement: c3ta10865a.pdf [file c3ta10865a.pdf]

## Supporting Information

### **Molecular Structures of Polymer/Sulfur Composites for Lithium-Sulfur Batteries with Long Cycle Life**

Lifen Xiao,<sup>a,c</sup> Yuliang Cao,\*<sup>b,c</sup> Jie Xiao,<sup>c</sup> Fei.Gao,<sup>c</sup> Birgit Schwenzer,<sup>c</sup> Mark H Engelhard,<sup>c</sup>  
Laxmikant V. Saraf,<sup>c</sup> Zimin Nie,<sup>c</sup> Gregory JExarhos,<sup>c</sup> and Jun Liu\*<sup>c</sup>

<sup>a</sup>*College of Chemistry, Central China Normal University, Wuhan 430079, P. R. China.*

<sup>b</sup>*College of Chemistry and Molecular Science, Wuhan University, Wuhan 430072, P. R. China. E-mail: [ylcao@whu.edu.cn](mailto:ylcao@whu.edu.cn).*

<sup>c</sup>*Pacific Northwest National Laboratory, Richland, WA 99352, USA. Fax: (509) 275-6242; Tel: (509) 375-4443; E-mail: [Jun.Liu@pnnl.gov](mailto:Jun.Liu@pnnl.gov).*

**Keywords:** vulcanized polyaniline, Self-breathing, Long cycle life, Lithium-sulfur batteries

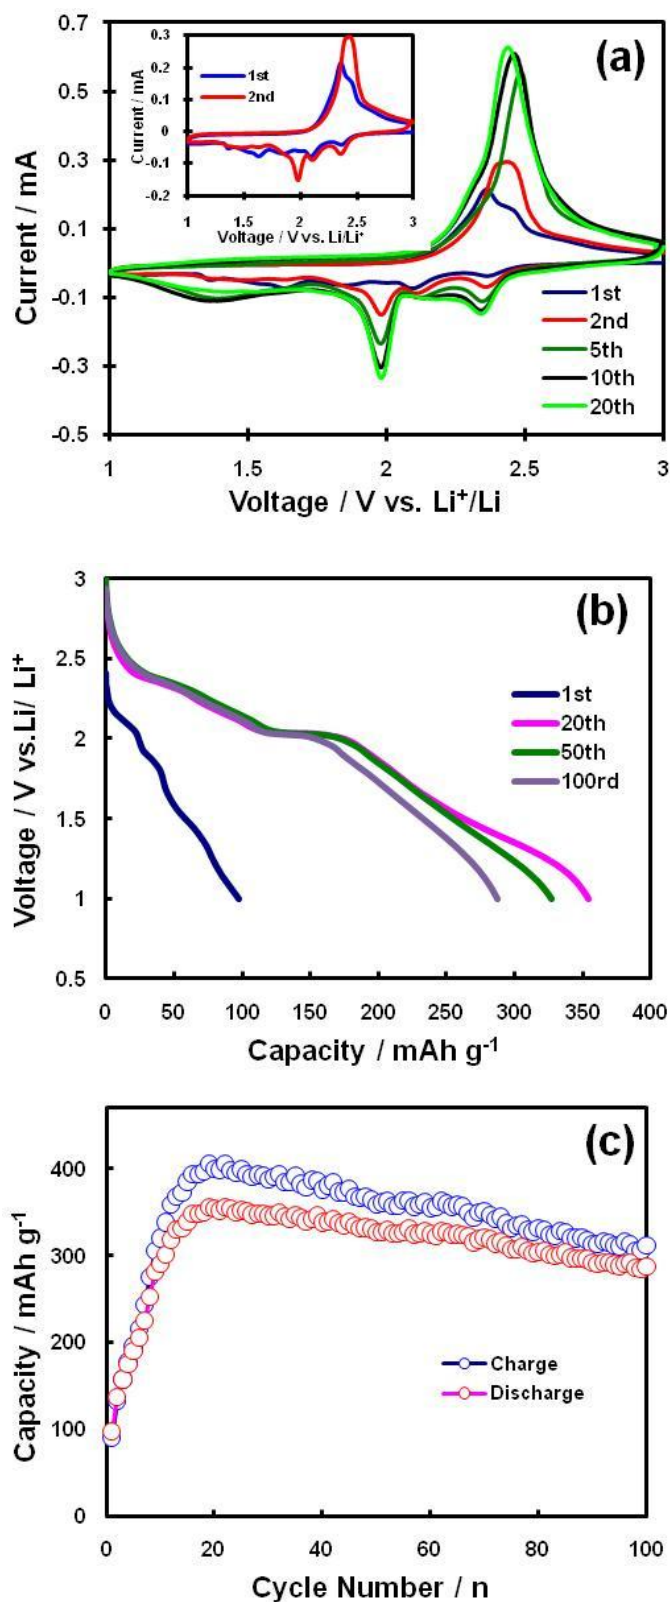

**Figure S1** (a) Cyclic voltammograms of SPANI (with residual S) electrode at  $0.1 \text{ mVs}^{-1}$  (inset shows the first two cycles), (b) discharge plots and (c) discharge and charge capacities vs. cycle numbers of SPANI electrode at  $100 \text{ mA g}^{-1}$ .

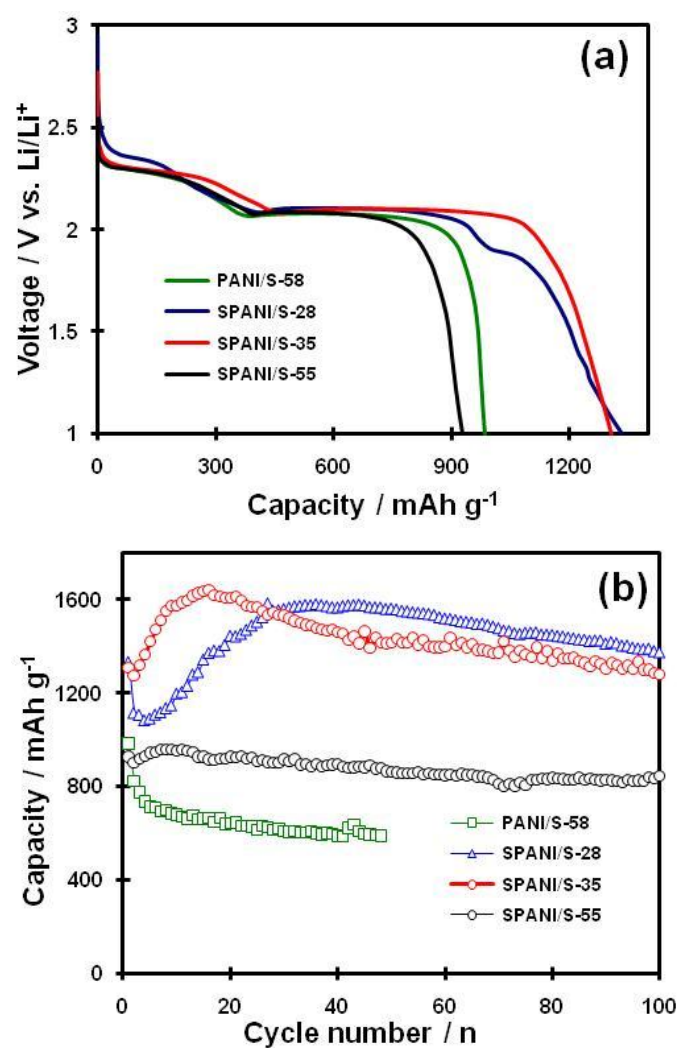

**Figure S2** (a) Discharge plots and (b) discharge capacities vs. cycle numbers of PANI/S-58 and SPANI/S-28, -35, -55 electrodes at 0.1C rate.

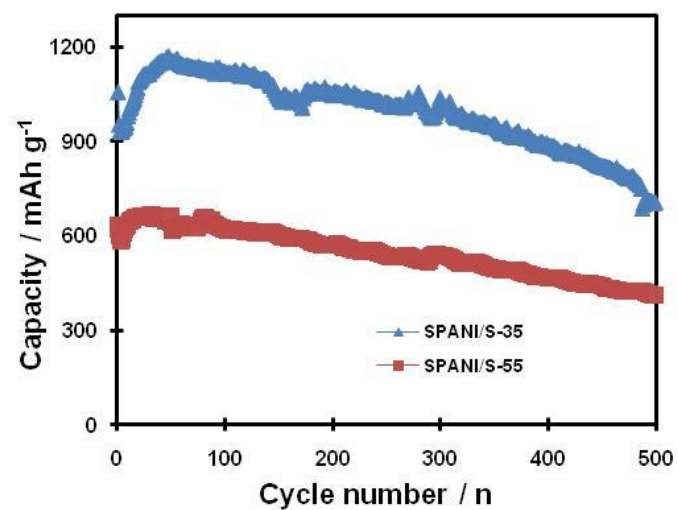

**Figure S3** Discharge capacities vs. cycle numbers of SPANI/S-35 and SPANI/S-55

electrodes at a 0.5 C rate.
